# Supplementary material for: Factors Influencing HPV Vaccine Intentions in Malaysian Men Who Have Sex with Men: A Cross-Sectional Study in Malaysia
Source: MDPI journal article supplement (doi:10.3390/pathogens12101261), 2023-10-19
Supplement: s1 [file s1]

**Supplementary File S1. Survey Questionnaire.**

**ACCEPTABILITY OF THE HUMAN PAPILLOMAVIRUS (HPV) VACCINE  
AMONG MEN WHO HAVE SEX WITH MEN (MSM) IN MALAYSIA**

**SECTION A: GENERAL INFORMATION**

|   |                                |                                                                                                                                                                                                                                      |
|---|--------------------------------|--------------------------------------------------------------------------------------------------------------------------------------------------------------------------------------------------------------------------------------|
| 1 | Age                            | _____ years old                                                                                                                                                                                                                      |
| 2 | Ethnicity                      | [ 1 ] Malay<br>[ 2 ] Chinese<br>[ 3 ] Indian<br>[ 4 ] Bumiputera Sabah/Sarawak<br>[ 5 ] Others, please specify_____                                                                                                                  |
| 3 | Occupation                     | [ 1 ] Professional and managerial<br>[ 2 ] Skilled worker<br>[ 3 ] Non-skilled worker<br>[ 4 ] Retired<br>[ 5 ] Unemployed<br>[ 6 ] Others, please specify_____                                                                      |
| 4 | Highest educational attainment | [ 1 ] No formal education<br>[ 2 ] Primary school<br>[ 3 ] Secondary school<br>[ 4 ] College/Bachelor<br>[ 5 ] Postgraduate                                                                                                          |
| 5 | Average monthly income         | [ 1 ] MYR1,000 and below<br>[ 2 ] 1001–2000<br>[ 3 ] 2001–3000<br>[ 4 ] 3001–4000<br>[ 5 ] 4001–5000<br>[ 6 ] 5001–6000<br>[ 7 ] 6001–7000<br>[ 8 ] 7001–8000<br>[ 9 ] 8001–9000<br>[ 10 ] 9001–10,000<br>[ 11 ] More than MYR10,000 |

**SECTION B: SEXUAL IDENTITY AND BEHAVIOR**

|   |                                                                                      |                                                                                                       |
|---|--------------------------------------------------------------------------------------|-------------------------------------------------------------------------------------------------------|
| 1 | Sexual identity?                                                                     | [ 1 ] Bisexual<br>[ 2 ] Gay/homosexual/PLU<br>[ 3 ] Heterosexual/straight<br>[ 4 ] Queer/gender queer |
| 2 | Anal intercourse without condoms with male sexual partner(s) in the last six months. | [ 1 ] Yes<br>[ 2 ] No                                                                                 |
| 3 | Symptoms related to sexually transmitted infections (STIs) in the last one year      | [ 1 ] Yes<br>[ 2 ] No                                                                                 |
| 4 | History of <u>sexually transmitted infections</u> in the last one year               | [ 1 ] Yes<br>[ 2 ] No                                                                                 |

### SECTION C: KNOWLEDGE RELATED TO HPV AND HPV VACCINATION

The following are questions about your views on Human Papilloma Virus (HPV), please answer “True”, “False”, or “Don’t know” to each statement

|   |                                                          |                                         |
|---|----------------------------------------------------------|-----------------------------------------|
| 1 | HPV can cause genital warts in the penis                 | [ 1 ] True [ 2 ] False [ 3 ] Don’t know |
| 2 | HPV can cause genital warts in the anus                  | [ 1 ] True [ 2 ] False [ 3 ] Don’t know |
| 3 | HPV can cause penile cancer                              | [ 1 ] True [ 2 ] False [ 3 ] Don’t know |
| 4 | HPV can cause anal cancer                                | [ 1 ] True [ 2 ] False [ 3 ] Don’t know |
| 5 | HPV is associated with oral cancer                       | [ 1 ] True [ 2 ] False [ 3 ] Don’t know |
| 6 | HPV may be spread from person to person through oral sex | [ 1 ] True [ 2 ] False [ 3 ] Don’t know |
| 7 | Genital HPV is transmitted through skin-to-skin contact  | [ 1 ] True [ 2 ] False [ 3 ] Don’t know |
| 8 | You can infect your sexual partner with HPV, even        | [ 1 ] True [ 2 ] False [ 3 ] Don’t know |

|    |                                                                    |                                         |
|----|--------------------------------------------------------------------|-----------------------------------------|
|    | though you don't present the symptoms                              |                                         |
| 9  | Risk of acquiring HPV increases with the number of sexual partners | [ 1 ] True [ 2 ] False [ 3 ] Don't know |
| 10 | If you get HPV infection, you will have HPV for life               | [ 1 ] True [ 2 ] False [ 3 ] Don't know |
| 11 | Condoms protect against HPV infection                              | [ 1 ] True [ 2 ] False [ 3 ] Don't know |
| 12 | There are many HPV types                                           | [ 1 ] True [ 2 ] False [ 3 ] Don't know |
| 13 | All HPV types cause cancer                                         | [ 1 ] True [ 2 ] False [ 3 ] Don't know |

#### SECTION D: ATTITUDES TOWARD HPV INFECTION AND HPV VACCINATION

| Attitudes towards HPV infection                                |                                                                                            |                        |                |             |                     |
|----------------------------------------------------------------|--------------------------------------------------------------------------------------------|------------------------|----------------|-------------|---------------------|
| 1                                                              | Please rate your chance of getting HPV infection                                           | [ 1 ] Very low         | [ 2 ] Low      | [ 3 ] High  | [ 4 ] Very high     |
| 2                                                              | What is your level of worriedness about the diseases that you will get from HPV infection? | [ 1 ] Very low         | [ 2 ] Low      | [ 3 ] High  | [ 4 ] Very high     |
| Please rate the level of agreement to the following statements |                                                                                            |                        |                |             |                     |
| 3                                                              | The chance of HPV infection seems small to me                                              | [ 1 ] Totally disagree | [ 2 ] Disagree | [ 3 ] Agree | [ 4 ] Totally agree |
| 4                                                              | HPV infection is not important enough to get vaccinated against                            | [ 1 ] Totally disagree | [ 2 ] Disagree | [ 3 ] Agree | [ 4 ] Totally agree |
| 5                                                              | The diseases I may get due to HPV infection are not serious                                | [ 1 ] Totally disagree | [ 2 ] Disagree | [ 3 ] Agree | [ 4 ] Totally agree |
| 6                                                              | HPV infection is a bigger problem for women than it is for men                             | [ 1 ] Totally disagree | [ 2 ] Disagree | [ 3 ] Agree | [ 4 ] Totally agree |
| Attitudes toward HPV vaccination                               |                                                                                            |                        |                |             |                     |
| 7                                                              | Getting vaccinated against HPV has more drawbacks than benefits                            | [ 1 ] Totally disagree | [ 2 ] Disagree | [ 3 ] Agree | [ 4 ] Totally agree |
| 8                                                              | I am against vaccination in general                                                        | [ 1 ] Totally disagree | [ 2 ] Disagree | [ 3 ] Agree | [ 4 ] Totally agree |
| 9                                                              | I don't have enough information about HPV vaccine to                                       | [ 1 ] Totally disagree | [ 2 ] Disagree | [ 3 ] Agree | [ 4 ] Totally agree |

|    |                                                                                    |                           |                   |                |                        |
|----|------------------------------------------------------------------------------------|---------------------------|-------------------|----------------|------------------------|
|    | decide on<br>vaccination                                                           |                           |                   |                |                        |
| 10 | The possible side effects of HPV vaccination in the long term are not clear to me  | [ 1 ]<br>Totally disagree | [ 2 ]<br>Disagree | [ 3 ]<br>Agree | [ 4 ]<br>Totally agree |
| 11 | It is embarrassing for men to take up HPV vaccines                                 | [ 1 ]<br>Totally disagree | [ 2 ]<br>Disagree | [ 3 ]<br>Agree | [ 4 ]<br>Totally agree |
| 12 | It is troublesome to take up HPV vaccines                                          | [ 1 ]<br>Totally disagree | [ 2 ]<br>Disagree | [ 3 ]<br>Agree | [ 4 ]<br>Totally agree |
| 13 | Taking up an HPV vaccine may be a sign of promiscuity                              | [ 1 ]<br>Totally disagree | [ 2 ]<br>Disagree | [ 3 ]<br>Agree | [ 4 ]<br>Totally agree |
| 14 | I find HPV vaccination a sensitive topic because it has to do with sexual activity | [ 1 ]<br>Totally disagree | [ 2 ]<br>Disagree | [ 3 ]<br>Agree | [ 4 ]<br>Totally agree |
| 15 | I am confident that I could take up HPV vaccines if I wanted to                    | [ 1 ]<br>Totally disagree | [ 2 ]<br>Disagree | [ 3 ]<br>Agree | [ 4 ]<br>Totally agree |
| 16 | I will take an HPV vaccine if a doctor recommends me to take up HPV vaccines       | [ 1 ]<br>Totally disagree | [ 2 ]<br>Disagree | [ 3 ]<br>Agree | [ 4 ]<br>Totally agree |
| 17 | I will take an HPV vaccine if my friends recommends me to take up HPV vaccines     | [ 1 ]<br>Totally disagree | [ 2 ]<br>Disagree | [ 3 ]<br>Agree | [ 4 ]<br>Totally agree |

## SECTION E: STIGMA

|   |                                                                                                        |                       |
|---|--------------------------------------------------------------------------------------------------------|-----------------------|
| 1 | Do you anticipate stigma in health care settings for gay and bisexual men who receive the HPV vaccine? | [ 1 ] Yes<br>[ 2 ] No |
|---|--------------------------------------------------------------------------------------------------------|-----------------------|

## SECTION F: VACCINATION INTENTION

Currently in Malaysia, the vaccine for HPV is available for boys and men and it has been shown to prevent genital warts and may help prevent certain HPV-related cancers. The vaccine requires 3 doses given over 6 months. Please rate your intention to get an HPV vaccination?

|   |                                                                                                                                       |                                                                                                                                                   |
|---|---------------------------------------------------------------------------------------------------------------------------------------|---------------------------------------------------------------------------------------------------------------------------------------------------|
| 1 | Please indicate your intention to receive the HPV vaccine on a scale of 1 to 7, with 1 being no chance and 7 being certain to happen. | [ 7 ] Certain to happen<br>[ 6 ] Very likely<br>[ 5 ] Likely<br>[ 4 ] Moderate chance<br>[ 3 ] Unlikely<br>[ 2 ] Very unlikely<br>[ 1 ] No chance |
|---|---------------------------------------------------------------------------------------------------------------------------------------|---------------------------------------------------------------------------------------------------------------------------------------------------|

Appendix 2 Univariable analysis of factors associated with intention to receive HPV vaccine in the next year (N=441)

| Univariable analysis              |            |                   |                           |         |
|-----------------------------------|------------|-------------------|---------------------------|---------|
| Intention to receive HPV vaccine  |            |                   |                           |         |
|                                   | N (%)      | Intent<br>(n=266) | Non-<br>intent<br>(n=175) | p-value |
| Socio-demographic characteristics |            |                   |                           |         |
| Age group (years)                 |            |                   |                           |         |
| 18–23                             | 106 (24.0) | 58 (21.8)         | 48 (27.8)                 | 0.482   |
| 24–29                             | 151 (34.2) | 97 (36.5)         | 54 (30.9)                 |         |
| 30–35                             | 116 (26.3) | 71 (26.7)         | 45 (25.7)                 |         |
| >35                               | 68 (15.4)  | 40 (15.0)         | 28 (16.0)                 |         |
| Ethnicity                         |            |                   |                           |         |
| Malay                             | 185 (42.0) | 132 (49.6)        | 53 (30.3)                 | 0.001   |
| Chinese                           | 214 (48.5) | 109 (41.0)        | 105 (60.0)                |         |
| Indian                            | 15 (3.4)   | 8 (3.0)           | 7 (4.0)                   |         |
| Bumiputera                        | 27 (6.1)   | 17 (6.4)          | 10 (5.7)                  |         |
| Sabah/Sarawak/Others              |            |                   |                           |         |

|                                                                                           |            |            |            |          |
|-------------------------------------------------------------------------------------------|------------|------------|------------|----------|
| Highest educational attainment                                                            |            |            |            |          |
| Secondary school and below                                                                | 39 (8.8)   | 25 (9.4)   | 14 (8.0)   | 0.834    |
| Diploma/Bachelor's degree                                                                 | 329 (74.6) | 196 (73.7) | 133 (76.0) |          |
| Postgraduate degree                                                                       | 73 (16.6)  | 45 (16.9)  | 28 (16.0)  |          |
| Occupation                                                                                |            |            |            |          |
| Professional and managerial                                                               | 236 (53.5) | 143 (53.8) | 93 (53.1)  | 0.072    |
| Skilled worker                                                                            | 48 (10.9)  | 31 (11.7)  | 17 (9.7)   |          |
| Non-skilled worker/ Self-employed                                                         | 32 (7.3)   | 24 (9.0)   | 8 (4.6)    |          |
| Student                                                                                   | 55 (12.5)  | 35 (13.2)  | 20 (11.4)  |          |
| Retired/Unemployed                                                                        | 70 (15.9)  | 33 (12.4)  | 37 (21.1)  |          |
| Monthly income (MYR)                                                                      |            |            |            |          |
| 1000 and below                                                                            | 112 (25.4) | 64 (24.1)  | 48 (27.4)  | 0.429    |
| 1001-4000                                                                                 | 167 (37.9) | 109 (41.0) | 58 (33.1)  |          |
| 4001-8000                                                                                 | 111 (25.2) | 64 (24.1)  | 47 (26.9)  |          |
| 80001 and above                                                                           | 51 (11.6)  | 29 (10.9)  | 22 (12.6)  |          |
| Sexual characteristics                                                                    |            |            |            |          |
| Sexual identity                                                                           |            |            |            |          |
| Bisexual                                                                                  | 82 (18.6)  | 58 (21.8)  | 24 (13.7)  | 0.006    |
| Gay/Homosexual/PLU                                                                        | 325 (73.7) | 194 (72.9) | 131 (74.9) |          |
| Heterosexual/straight                                                                     | 27 (6.1)   | 9 (3.4)    | 18 (10.3)  |          |
| Queer/gender queer †                                                                      | 7 (1.6)    | 5 (1.9)    | 2 (1.1)    |          |
| Sexual behaviour                                                                          |            |            |            |          |
| Engaging in anal intercourse without condom with male sexual partner in the past 6 months |            |            |            |          |
| Yes                                                                                       | 213 (48.3) | 135 (50.8) | 78 (44.6)  | 0.207    |
| No                                                                                        | 228 (51.7) | 131 (49.2) | 97 (55.4)  |          |
| Symptoms related to sexually transmitted infections in the last year                      |            |            |            |          |
| Yes                                                                                       | 111 (25.2) | 82 (30.8)  | 29 (16.6)  | 0.001    |
| No                                                                                        | 330 (74.8) | 184 (69.2) | 146 (83.4) |          |
| History of sexually transmitted infections in the last year                               |            |            |            |          |
| Yes                                                                                       | 118 (26.8) | 86 (32.3)  | 32 (18.3)  | 0.001    |
| No                                                                                        | 323 (73.2) | 180 (67.7) | 143 (81.7) |          |
| Knowledge related to HPV and HPV infection                                                |            |            |            |          |
| Total knowledge score                                                                     |            |            |            |          |
| Low score (0–7)                                                                           | 209 (47.4) | 97 (36.5)  | 112 (64.0) | p<0.0001 |
| High score (8–13)                                                                         | 232 (52.6) | 169 (63.5) | 63 (36.0)  |          |

|                                                                             |            |            |            |          |
|-----------------------------------------------------------------------------|------------|------------|------------|----------|
| Attitudes towards HPV infection                                             |            |            |            |          |
| Level of chance of getting HPV infection                                    |            |            |            |          |
| Very high/High                                                              | 158 (35.8) | 126 (47.4) | 32 (18.3)  | p<0.0001 |
| Low/Very low                                                                | 283 (64.2) | 140 (52.6) | 143 (81.7) |          |
| Level of worriedness about getting disease from HPV infection               |            |            |            |          |
| Very high/High                                                              | 250 (56.7) | 189 (71.1) | 61 (34.9)  | p<0.0001 |
| Low/Very low                                                                | 191 (43.3) | 77 (28.9)  | 114 (65.1) |          |
| The chance of HPV infection seems small to me                               |            |            |            |          |
| Strongly agree/Agree                                                        | 128 (29.0) | 67 (25.2)  | 61 (34.9)  | 0.032    |
| Disagree/Strongly disagree                                                  | 313 (71.0) | 199 (74.8) | 114 (65.1) |          |
| HPV infection is not important enough to get vaccinated against             |            |            |            |          |
| Strongly agree/Agree                                                        | 46 (10.4)  | 23 (8.6)   | 23 (13.1)  | 0.152    |
| Disagree/Strongly disagree                                                  | 395 (89.6) | 243 (91.4) | 152 (86.9) |          |
| The diseases I may get due to HPV infections are not serious                |            |            |            |          |
| Strongly agree/Agree                                                        | 14 (3.2)   | 4 (1.5)    | 10 (5.7)   | 0.023    |
| Disagree/Strongly disagree                                                  | 427 (96.8) | 262 (98.5) | 165 (94.3) |          |
| HPV infection is a bigger problem for women than it is for men              |            |            |            |          |
| Strongly agree/Agree                                                        | 34 (7.7)   | 17 (6.4)   | 17 (9.7)   | 0.207    |
| Disagree/Strongly disagree                                                  | 407 (92.3) | 249 (93.6) | 158 (90.3) |          |
| Attitudes towards HPV vaccination                                           |            |            |            |          |
| Getting vaccinated against HPV has more drawbacks than benefits             |            |            |            |          |
| Strongly agree/Agree                                                        | 22 (5.0)   | 10 (3.8)   | 12 (6.9)   | 0.180    |
| Disagree/Strongly disagree                                                  | 419 (95.0) | 256 (96.2) | 163 (93.1) |          |
| I am against vaccination in general                                         |            |            |            |          |
| Strongly agree/Agree                                                        | 15 (3.4)   | 7 (2.6)    | 8 (4.6)    | 0.293    |
| Disagree/Strongly disagree                                                  | 426 (96.6) | 259 (97.4) | 167 (95.4) |          |
| I do not have enough information about HPV vaccine to decide on vaccination |            |            |            |          |
| Strongly agree/Agree                                                        | 305 (69.2) | 204 (76.7) | 101 (57.7) | p<0.0001 |



|                                                                                                 |            |            |            |          |
|-------------------------------------------------------------------------------------------------|------------|------------|------------|----------|
| Disagree/Strongly disagree                                                                      | 136 (30.8) | 62 (23.3)  | 74 (42.3)  |          |
| The long-term potential side effects of HPV vaccination remain unclear                          |            |            |            |          |
| Strongly agree/Agree                                                                            | 312 (70.7) | 210 (78.9) | 102 (58.3) | p<0.0001 |
| Disagree/Strongly disagree                                                                      | 129 (29.3) | 56 (21.1)  | 73 (41.7)  |          |
| It is embarrassing for men to take up HPV vaccines                                              |            |            |            |          |
| Strongly agree/Agree                                                                            | 120 (27.2) | 70 (26.3)  | 50 (28.6)  | 0.662    |
| Disagree/Strongly disagree                                                                      | 321 (72.8) | 196 (73.7) | 125 (71.4) |          |
| It is troublesome to take up HPV vaccines                                                       |            |            |            |          |
| Strongly agree/Agree                                                                            | 152 (34.5) | 98 (36.8)  | 54 (30.9)  | 0.219    |
| Disagree/Strongly disagree                                                                      | 289 (65.5) | 168 (63.2) | 121 (69.1) |          |
| Taking up HPV vaccines may be a sign of promiscuity                                             |            |            |            |          |
| Strongly agree/Agree                                                                            | 144 (32.7) | 96 (36.1)  | 48 (27.4)  | 0.062    |
| Disagree/Strongly disagree                                                                      | 297 (67.3) | 170 (63.9) | 127 (72.6) |          |
| I find HPV vaccination a sensitive topic because it has to do with sexual activity              |            |            |            |          |
| Strongly agree/Agree                                                                            | 210 (47.6) | 143 (53.8) | 67 (38.3)  | 0.002    |
| Disagree/Strongly disagree                                                                      | 231 (52.4) | 123 (46.2) | 108 (61.7) |          |
| I am confident that I could take up HPV vaccines if I wanted to                                 |            |            |            |          |
| Strongly agree/Agree                                                                            | 349 (79.1) | 244 (91.7) | 105 (60.0) | p<0.0001 |
| Disagree/Strongly disagree                                                                      | 92 (20.9)  | 22 (8.3)   | 70 (40.0)  |          |
| I will take an HPV vaccine if a doctor recommends me to take up HPV vaccines                    |            |            |            |          |
| Strongly agree/Agree                                                                            | 364 (82.5) | 252 (94.7) | 112 (64.0) | p<0.0001 |
| Disagree/Strongly disagree                                                                      | 77 (17.5)  | 14 (5.3)   | 63 (36.0)  |          |
| I will take an HPV vaccine if my friends recommends me to take up HPV vaccines                  |            |            |            |          |
| Strongly agree/Agree                                                                            | 329 (74.6) | 233 (87.6) | 96 (54.9)  | p<0.0001 |
| Disagree/Strongly disagree                                                                      | 112 (25.4) | 33 (12.4)  | 79 (45.1)  |          |
| <b>Stigma</b>                                                                                   |            |            |            |          |
| I anticipate stigma in healthcare settings surrounding HPV vaccination for gay and bisexual men |            |            |            |          |
| Yes                                                                                             | 334 (75.7) | 199 (74.8) | 135 (77.1) | 0.650    |
| No                                                                                              | 107 (24.3) | 67 (25.2)  | 40 (22.9)  |          |

**Supplementary Table S1.** Univariable analysis of factors associated with intention to receive HPV vaccine in the next year (N=441).

| Univariable analysis                              |            |                   |                           |         |
|---------------------------------------------------|------------|-------------------|---------------------------|---------|
| Intention to receive HPV vaccine in the next year |            |                   |                           |         |
|                                                   | N (%)      | Intent<br>(n=266) | Non-<br>intent<br>(n=175) | p-value |
| Socio-demographic characteristics                 |            |                   |                           |         |
| Age group (years)                                 |            |                   |                           |         |
| 18–23                                             | 106 (24.0) | 58 (21.8)         | 48 (27.8)                 | 0.482   |
| 24–29                                             | 151 (34.2) | 97 (36.5)         | 54 (30.9)                 |         |
| 30–35                                             | 116 (26.3) | 71 (26.7)         | 45 (25.7)                 |         |
| >35                                               | 68 (15.4)  | 40 (15.0)         | 28 (16.0)                 |         |
| Ethnicity                                         |            |                   |                           |         |
| Malay                                             | 185 (42.0) | 132 (49.6)        | 53 (30.3)                 | 0.001   |
| Chinese                                           | 214 (48.5) | 109 (41.0)        | 105 (60.0)                |         |
| Indian                                            | 15 (3.4)   | 8 (3.0)           | 7 (4.0)                   |         |
| Bumiputera                                        | 27 (6.1)   | 17 (6.4)          | 10 (5.7)                  |         |
| Sabah/Sarawak/Others                              |            |                   |                           |         |
| Highest educational attainment                    |            |                   |                           |         |
| Secondary school and below                        | 39 (8.8)   | 25 (9.4)          | 14 (8.0)                  | 0.834   |
| Diploma/Bachelor’s degree                         | 329 (74.6) | 196 (73.7)        | 133 (76.0)                |         |
| Postgraduate degree                               | 73 (16.6)  | 45 (16.9)         | 28 (16.0)                 |         |
| Occupation                                        |            |                   |                           |         |
| Professional and managerial                       | 236 (53.5) | 143 (53.8)        | 93 (53.1)                 | 0.072   |
| Skilled worker                                    | 48 (10.9)  | 31 (11.7)         | 17 (9.7)                  |         |
| Non-skilled worker/ Self-employed                 | 32 (7.3)   | 24 (9.0)          | 8 (4.6)                   |         |
| Student                                           | 55 (12.5)  | 35 (13.2)         | 20 (11.4)                 |         |
| Retired/Unemployed                                | 70 (15.9)  | 33 (12.4)         | 37 (21.1)                 |         |
| Monthly income (MYR)                              |            |                   |                           |         |
| 1000 and below                                    | 112 (25.4) | 64 (24.1)         | 48 (27.4)                 | 0.429   |
| 1001–4000                                         | 167 (37.9) | 109 (41.0)        | 58 (33.1)                 |         |
| 4001–8000                                         | 111 (25.2) | 64 (24.1)         | 47 (26.9)                 |         |
| 80001 and above                                   | 51 (11.6)  | 29 (10.9)         | 22 (12.6)                 |         |
| Sexual characteristics                            |            |                   |                           |         |
| Sexual identity                                   |            |                   |                           |         |
| Bisexual                                          | 82 (18.6)  | 58 (21.8)         | 24 (13.7)                 | 0.006   |
| Gay/Homosexual/PLU                                | 325 (73.7) | 194 (72.9)        | 131 (74.9)                |         |

|                                                                                           |            |            |            |          |
|-------------------------------------------------------------------------------------------|------------|------------|------------|----------|
| Heterosexual/straight                                                                     | 27 (6.1)   | 9 (3.4)    | 18 (10.3)  |          |
| Queer/gender queer †                                                                      | 7 (1.6)    | 5 (1.9)    | 2 (1.1)    |          |
| Sexual behaviour                                                                          |            |            |            |          |
| Engaging in anal intercourse without condom with male sexual partner in the past 6 months |            |            |            |          |
| Yes                                                                                       | 213 (48.3) | 135 (50.8) | 78 (44.6)  | 0.207    |
| No                                                                                        | 228 (51.7) | 131 (49.2) | 97 (55.4)  |          |
| Symptoms related to sexually transmitted infections in the last year                      |            |            |            |          |
| Yes                                                                                       | 111 (25.2) | 82 (30.8)  | 29 (16.6)  | 0.001    |
| No                                                                                        | 330 (74.8) | 184 (69.2) | 146 (83.4) |          |
| History of sexually transmitted infections in the last year                               |            |            |            |          |
| Yes                                                                                       | 118 (26.8) | 86 (32.3)  | 32 (18.3)  | 0.001    |
| No                                                                                        | 323 (73.2) | 180 (67.7) | 143 (81.7) |          |
| Knowledge related to HPV and HPV infection                                                |            |            |            |          |
| Total knowledge score                                                                     |            |            |            |          |
| Low score (0–7)                                                                           | 209 (47.4) | 97 (36.5)  | 112 (64.0) | p<0.0001 |
| High score (8–13)                                                                         | 232 (52.6) | 169 (63.5) | 63 (36.0)  |          |
| Attitudes towards HPV infection                                                           |            |            |            |          |
| Level of chance of getting HPV infection                                                  |            |            |            |          |
| Very high/High                                                                            | 158 (35.8) | 126 (47.4) | 32 (18.3)  | p<0.0001 |
| Low/Very low                                                                              | 283 (64.2) | 140 (52.6) | 143 (81.7) |          |
| Level of worriedness about getting disease from HPV infection                             |            |            |            |          |
| Very high/High                                                                            | 250 (56.7) | 189 (71.1) | 61 (34.9)  | p<0.0001 |
| Low/Very low                                                                              | 191 (43.3) | 77 (28.9)  | 114 (65.1) |          |
| The chance of HPV infection seems small to me                                             |            |            |            |          |
| Strongly agree/Agree                                                                      | 128 (29.0) | 67 (25.2)  | 61 (34.9)  | 0.032    |
| Disagree/Strongly disagree                                                                | 313 (71.0) | 199 (74.8) | 114 (65.1) |          |
| HPV infection is not important enough to get vaccinated against                           |            |            |            |          |
| Strongly agree/Agree                                                                      | 46 (10.4)  | 23 (8.6)   | 23 (13.1)  | 0.152    |
| Disagree/Strongly disagree                                                                | 395 (89.6) | 243 (91.4) | 152 (86.9) |          |

The diseases I may get due to HPV infections are not serious

|                            |            |            |            |       |
|----------------------------|------------|------------|------------|-------|
| Strongly agree/Agree       | 14 (3.2)   | 4 (1.5)    | 10 (5.7)   | 0.023 |
| Disagree/Strongly disagree | 427 (96.8) | 262 (98.5) | 165 (94.3) |       |

HPV infection is a bigger problem for women than it is for men

|                            |            |            |            |       |
|----------------------------|------------|------------|------------|-------|
| Strongly agree/Agree       | 34 (7.7)   | 17 (6.4)   | 17 (9.7)   | 0.207 |
| Disagree/Strongly disagree | 407 (92.3) | 249 (93.6) | 158 (90.3) |       |

---

Attitudes towards HPV vaccination

---

Getting vaccinated against HPV has more drawbacks than benefits

|                            |            |            |            |       |
|----------------------------|------------|------------|------------|-------|
| Strongly agree/Agree       | 22 (5.0)   | 10 (3.8)   | 12 (6.9)   | 0.180 |
| Disagree/Strongly disagree | 419 (95.0) | 256 (96.2) | 163 (93.1) |       |

I am against vaccination in general

|                            |            |            |            |       |
|----------------------------|------------|------------|------------|-------|
| Strongly agree/Agree       | 15 (3.4)   | 7 (2.6)    | 8 (4.6)    | 0.293 |
| Disagree/Strongly disagree | 426 (96.6) | 259 (97.4) | 167 (95.4) |       |

I do not have enough information about HPV vaccine to decide on vaccination

|                            |            |            |            |          |
|----------------------------|------------|------------|------------|----------|
| Strongly agree/Agree       | 305 (69.2) | 204 (76.7) | 101 (57.7) | p<0.0001 |
| Disagree/Strongly disagree | 136 (30.8) | 62 (23.3)  | 74 (42.3)  |          |

The long-term potential side effects of HPV vaccination remain unclear

|                            |            |            |            |          |
|----------------------------|------------|------------|------------|----------|
| Strongly agree/Agree       | 312 (70.7) | 210 (78.9) | 102 (58.3) | p<0.0001 |
| Disagree/Strongly disagree | 129 (29.3) | 56 (21.1)  | 73 (41.7)  |          |

It is embarrassing for men to take up HPV vaccines

|                            |            |            |            |       |
|----------------------------|------------|------------|------------|-------|
| Strongly agree/Agree       | 120 (27.2) | 70 (26.3)  | 50 (28.6)  | 0.662 |
| Disagree/Strongly disagree | 321 (72.8) | 196 (73.7) | 125 (71.4) |       |

It is troublesome to take up HPV vaccines

|                            |            |            |            |       |
|----------------------------|------------|------------|------------|-------|
| Strongly agree/Agree       | 152 (34.5) | 98 (36.8)  | 54 (30.9)  | 0.219 |
| Disagree/Strongly disagree | 289 (65.5) | 168 (63.2) | 121 (69.1) |       |

Taking up the HPV vaccine may be a sign of promiscuity

|                            |            |            |            |       |
|----------------------------|------------|------------|------------|-------|
| Strongly agree/Agree       | 144 (32.7) | 96 (36.1)  | 48 (27.4)  | 0.062 |
| Disagree/Strongly disagree | 297 (67.3) | 170 (63.9) | 127 (72.6) |       |

|                                                                                                 |            |            |            |          |
|-------------------------------------------------------------------------------------------------|------------|------------|------------|----------|
| I find HPV vaccination a sensitive topic because it has to do with sexual activity              |            |            |            |          |
| Strongly agree/Agree                                                                            | 210 (47.6) | 143 (53.8) | 67 (38.3)  | 0.002    |
| Disagree/Strongly disagree                                                                      | 231 (52.4) | 123 (46.2) | 108 (61.7) |          |
| I am confident that I could take up HPV vaccines if I wanted to                                 |            |            |            |          |
| Strongly agree/Agree                                                                            | 349 (79.1) | 244 (91.7) | 105 (60.0) | p<0.0001 |
| Disagree/Strongly disagree                                                                      | 92 (20.9)  | 22 (8.3)   | 70 (40.0)  |          |
| I will take an HPV vaccine if a doctor recommends me to take up HPV vaccines                    |            |            |            |          |
| Strongly agree/Agree                                                                            | 364 (82.5) | 252 (94.7) | 112 (64.0) | p<0.0001 |
| Disagree/Strongly disagree                                                                      | 77 (17.5)  | 14 (5.3)   | 63 (36.0)  |          |
| I will take an HPV vaccine if my friends recommend me to take up HPV vaccines                   |            |            |            |          |
| Strongly agree/Agree                                                                            | 329 (74.6) | 233 (87.6) | 96 (54.9)  | p<0.0001 |
| Disagree/Strongly disagree                                                                      | 112 (25.4) | 33 (12.4)  | 79 (45.1)  |          |
| <hr/> Stigma <hr/>                                                                              |            |            |            |          |
| I anticipate stigma in healthcare settings surrounding HPV vaccination for gay and bisexual men |            |            |            |          |
| Yes                                                                                             | 334 (75.7) | 199 (74.8) | 135 (77.1) | 0.650    |
| No                                                                                              | 107 (24.3) | 67 (25.2)  | 40 (22.9)  |          |
